# Supplementary material
Source: publisher site journal article supplement (https://www.degruyterbrill.com/publication/isbn/9783110321425/downloadAsset/9783110321425_Inhaltsverzeichnis.pdf)
Supplement: Supplementary file 1 [file 9783110321425_Inhaltsverzeichnis.pdf]

# Inhaltsübersicht

Vorwort — V

Autoren- und Inhaltsübersicht — VII

Abkürzungsverzeichnis — XXXI

## Einleitung

**Besonderes Verwaltungsrecht und Allgemeines Verwaltungsrecht: Zusammenwirken und Lerneffekte**

- I. Praktische Aufgaben der Orientierung und Entlastung — 1
- II. Speziell für das Studium: Veranschaulichung, Wiederholung, Vertiefung — 2
- III. Aufgaben der verwaltungsrechtlichen Systembildung — 5

## Erstes Kapitel

### Kommunalrecht

- I. Grundlagen — 12
  - 1. Gesetzliche Grundlagen — 13
    - a) Kommunalrecht ieS — 13
    - b) Rechtsgrundlagen kommunaler Tätigkeit — 13
  - 2. Grundbegriffe: Gemeinde, Einwohner, Bürger — 14
    - a) Gemeinde — 14
    - b) Einwohner und Bürger — 14
    - c) Rechte und Pflichten der Einwohner und Bürger — 15
  - 3. Die Idee bürgerschaftlicher Selbstverwaltung — 15
  - 4. Entwicklung der Kommunen in der Bundesrepublik Deutschland — 16
    - a) Territorialreformen — 16
    - b) Die Bedeutung des Rechts der Europäischen Union — 17
  - 5. Aktuelle Herausforderungen — 18
    - a) Bevölkerungsdynamik — 18
    - b) Kommunale Finanzen — 19
    - c) Veränderte Kommunikationsstrukturen — 19
- II. Die Verfassungsgarantie des Art 28 II GG — 20
  - 1. Vorbemerkung: Die verfassungsrechtliche Stellung der Gemeinden — 20
    - a) Gemeinden: Ein besonderer Teil des Staates — 20
    - b) Die demokratische Verfassungsstruktur in der Gemeinde, Art 28 I 2 GG — 21
    - c) Die Verfassungsgarantie der kommunalen Selbstverwaltung — 21
      - aa) Adressaten der Selbstverwaltungsgarantie — 22
      - bb) „Institutionelle Garantie“ und subjektive Rechtsstellung — 22
  - 2. Garantie der kommunalen Ebene, Art 28 I 2, II GG — 23
  - 3. Schutz der individuellen Gemeinde in ihrem Bestand — 23

4. Schutz der eigenverantwortlichen Wahrnehmung kommunaler Aufgaben — **24**
    - a) Angelegenheiten der örtlichen Gemeinschaft — **25**
    - b) Zuweisung durch den Gesetzgeber — **25**
      - aa) Verpflichtung auf eine kommunalspezifische Aufgabenausstattung — **26**
      - bb) Abweichung von der Regelzuweisung — **26**
      - cc) Überörtliche Angelegenheiten, Gemengelage, Wanderungsprozesse — **27**
      - dd) Art 28 II GG als Schranke kommunalen Handelns? — **28**
    - c) Eigenverantwortlichkeit — **29**
    - d) Insbesondere: So genannte Gemeindehoheiten — **30**
    - e) Der Gesetzesvorbehalt und seine Grenzen — **32**
      - aa) Die Kernbereichsgarantie — **32**
      - bb) Gemeindespezifisches materielles Aufgabenverteilungsprinzip — **33**
      - cc) Zugriff auf die Eigenverantwortlichkeit: Hinreichender Spielraum — **33**
      - dd) Zuweisung zusätzlicher Aufgaben — **33**
  5. Die Selbstverwaltungsgarantie als subjektives Recht — **34**
    - a) Kommunale Verfassungsbeschwerden — **34**
    - b) Die Bedeutung der Selbstverwaltungsgarantie für das einfache Recht — **34**
- III. Weitere Gewährleistungen gemeindlicher Selbstverwaltung und kommunaler Rechtspositionen — **36**
1. Gewährleistungen auf europäischer Ebene — **36**
    - a) Unionsrechtliche Gewährleistung der Selbstverwaltung — **36**
    - b) Die Berufung auf Europäische Grundrechte und Grundfreiheiten — **37**
  2. Gewährleistungen im Grundgesetz — **37**
    - a) Partielle Finanzgarantien — **37**
    - b) Grundrechte — **38**
      - aa) Bereiche öffentlicher Aufgabenerfüllung — **38**
      - bb) Bereiche fiskalisch-erwerbswirtschaftlicher Tätigkeit — **39**
  3. Selbstverwaltungsgarantien der Landesverfassungen — **39**
- IV. Die Gemeinden im Gefüge öffentlicher Aufgabenerfüllung – Aufgabensystematik, Staatsaufsicht und Aufgabenträger — **40**
1. Kommunale Aufgabensystematik — **41**
    - a) Aufgabenkategorien und Staatseinfluss — **41**
      - aa) Überblick — **41**
      - bb) Dualistisches und monistisches Modell — **41**
      - cc) Eigener Wirkungskreis/Freie und pflichtige Selbstverwaltungsaufgaben — **41**
      - dd) Auftragsangelegenheiten/Pflichtaufgaben nach Weisung — **42**
    - b) Das systematische Verständnis des Staatseinflusses bei den „Staatsaufgaben“/Pflichtaufgaben nach Weisung — **42**
      - aa) Die Perspektive des Art 28 II GG — **43**
      - bb) Differenzierungen — **44**
      - cc) Ergebnis — **44**
      - dd) Verfahrens- und prozessrechtliche Konsequenzen — **44**
  2. Rechtsaufsicht — **45**
    - a) Aufsichtsmittel — **45**
    - b) Rahmenbedingungen und Rechtsschutz — **46**

3. **Fachaufsicht — 47**
    - a) **Wesen und Regelungen — 47**
    - b) **Rechtsschutz gegen fachaufsichtliche Maßnahmen — 48**
  4. **Mittel präventiver Aufsicht — 49**
    - a) **Zweck und Typik — 49**
    - b) **Spezielle Genehmigungsvorbehalte — 49**
      - aa) **Rechtliche Unbedenklichkeitserklärung — 50**
      - bb) **Staatliche Mitentscheidung, Kondominium — 50**
  5. **Formen der öffentlichen Aufgabenwahrnehmung im gemeindlichen Raum — 51**
    - a) **Staatliche Behörden — 51**
    - b) **Weitere Modi der Aufgabenwahrnehmung — 51**
    - c) **Privatisierung — 52**
  6. **Aufgabenbestand und Gemeindestatus: kreisfreie und kreisangehörige Gemeinden — 52**
    - a) **Das Bild der Einheitsgemeinde — 53**
    - b) **Kreisangehörige Gemeinden — 53**
    - c) **Kreisfreie Städte — 53**
    - d) **Privilegierte kreisangehörige Gemeinden — 53**
- V. Gemeindeverfassungsrecht — 54**
1. **Kommunalwahlen — 54**
    - a) **Grundsätze — 54**
    - b) **Rechtsschutz bei Kommunalwahlen — 55**
  2. **Überblick: Die Gemeindeorgane — 56**
  3. **Der Gemeinderat — 57**
    - a) **Zusammensetzung und Mitgliederstatus — 57**
      - aa) **Rechts- und Pflichtenstatus — 58**
      - bb) **Insbesondere Befangenheitsvorschriften — 58**
    - b) **Interne Organisation und Verfahren des Rates — 59**
      - aa) **Ratsvorsitzender — 60**
      - bb) **Ratsgeschäftsordnung — 60**
      - cc) **Ratssitzungen — 60**
      - dd) **Ratsausschüsse — 61**
      - ee) **Fraktionen — 62**
    - c) **Aufgaben des Gemeinderates — 62**
      - aa) **Systematik — 62**
      - bb) **Vorbehaltsaufgaben des Rates (Überblick) — 63**
  4. **Der Bürgermeister — 63**
    - a) **Status — 64**
    - b) **Aufgaben — 64**
      - aa) **Ratszuarbeitung, Ratsvorsitz — 64**
      - bb) **Einspruchsrecht — 64**
      - cc) **Geschäfte der laufenden Verwaltung — 65**
      - dd) **Übertragene Angelegenheiten — 65**
      - ee) **Dringlichkeitsentscheidungen — 66**
      - ff) **Außenwirksame Entscheidungen: Verwaltungschef, rechtsgeschäftliche Vertretung, Beteiligungsrechte — 66**
  5. **Besonderheiten kollegialer Leitungsgremien — 66**
  6. **Kommunalverfassungsstreit — 67**
    - a) **Grundfragen und Entwicklung — 67**

- b) Einzelheiten — **68**
- 7. Formen plebiszitärer Beteiligung — **69**
  - a) Schlichte Mitwirkungsmöglichkeiten — **69**
  - b) Mitentscheidungsmöglichkeiten — **70**
- 8. Gemeindeinterne Gliederungen: Bezirke, Ortschaften — **71**
- VI. Die Gemeindeverwaltung — **73**
  - 1. Grundlagen — **73**
  - 2. Die allgemeine Gemeindeverwaltung — **73**
  - 3. Wirtschaftliche Unternehmen in öffentlich-rechtlicher Rechtsform — **74**
    - a) Überblick — **74**
    - b) Eigenbetrieb, Kommunalunternehmen — **74**
  - 4. Privatrechtliche Organisationsformen als Teil des kommunalen Organisationsrechts — **75**
    - a) Rechtsformen — **75**
    - b) Erhalt der Gemeinwohlbindungen – „Einwirkungspflicht“ — **76**
  - 5. Vertragliche Verwaltungsstrukturen in der Kommune — **77**
- VII. Kommunalspezifische Handlungsformen: Rechtsetzung der Gemeinden und kommunale Verträge — **78**
  - 1. Gemeindliche Satzungen — **79**
    - a) Regelungstypus — **79**
    - b) Ermächtigungsgrundlage für kommunale Satzungen und Gesetzesvorbehalt — **79**
    - c) Formelle Vorgaben — **81**
      - aa) Satzungsgebungsverfahren — **81**
      - bb) Verfahrensfehler — **81**
    - d) Materielle Anforderungen an Satzungen, insbes Vorrang des Gesetzes — **82**
    - e) Rechtsschutz gegen Satzungen — **83**
  - 2. Weitere gemeindliche Rechtsetzungsakte — **83**
    - a) Rechtsverordnungen — **84**
    - b) Inneradministrative Rechtssätze — **84**
  - 3. Kommunale Verträge — **84**
    - a) Wirksames Zustandekommen — **84**
      - aa) Allgemein — **84**
      - bb) Insbesondere: Vergaberecht — **85**
    - b) Grenzen der Wirksamkeit — **86**
- VIII. Die Leistungen der Gemeinden für ihre Einwohner — **87**
  - 1. Das Recht kommunaler Leistungserbringung — **87**
    - a) Grundfragen — **87**
    - b) Modi kommunaler Leistungserbringung — **88**
  - 2. Insbesondere: Öffentliche Einrichtungen — **88**
    - a) Begriff — **88**
    - b) Widmung — **89**
    - c) Nutzungsrechte — **90**
    - d) Benutzungsverhältnis — **91**
      - aa) Bei öffentlich-rechtlicher Organisationsform — **91**
      - bb) Bei privatrechtlicher Organisationsform — **92**
      - cc) Benutzungsbedingungen — **92**
    - e) Rechtsformen und Zugang — **93**

3. Einrichtungen mit Anschluss- und Benutzungszwang — **94**
  - a) Tatbestand — **94**
  - b) Grundrechtsfragen — **95**
    - aa) Anschlusspflichtige — **95**
    - bb) Anbieter gleichartiger Leistungen — **95**
- IX. Die wirtschaftliche Betätigung der Gemeinden — **96**
  1. Grundlagen — **96**
    - a) Kommunale Wirtschaft zwischen Daseinsvorsorge und Gewinnerzielung — **96**
    - b) Schutzzweck des kommunalen Wirtschaftsrechts — **97**
    - c) Systematische Überlegungen — **98**
  2. Kommunalrechtliche Schranken gemeindlicher Wirtschaftstätigkeit — **98**
    - a) Anwendbarkeit — **98**
    - b) Kommunalrechtliche Schrankentrias — **99**
      - aa) Öffentlicher Zweck — **99**
      - bb) Leistungsfähigkeitsbezug — **100**
      - cc) Sog Subsidiarität — **100**
      - dd) Insbesondere: Territorialitätsprinzip — **101**
    - c) Durchsetzung der kommunalrechtlichen Schranken — **101**
      - aa) Subjektiv-öffentliche Rechte — **101**
      - bb) Durchsetzung über Wettbewerbsrecht (UWG, Vergaberecht) — **102**
    - d) Das Recht nichtwirtschaftlicher Unternehmen — **102**
  3. Allgemeines Wirtschaftsrecht — **103**
  4. Unionsrechtlicher Rahmen — **103**
    - a) Der allgemeine Rahmen — **104**
    - b) Bereichsspezifische Vorgaben — **105**
- X. Finanzen und Haushalt — **106**
  1. Das Gemeindefinanzsystem — **106**
    - a) Überblick über die Einnahmen — **106**
    - b) Steuereinnahmen — **107**
    - c) Gebühren und Beiträge, privatrechtliche Entgelte — **107**
    - d) Finanzzuweisungen, insbes der kommunale Finanzausgleich — **108**
    - e) Kredite und Entschuldung — **109**
    - f) Reformbedarf — **110**
  2. Kommunales Abgabenrecht — **110**
    - a) Steuern — **110**
    - b) Gebühren und Beiträge, privatrechtliche Entgelte — **111**
  3. Haushaltsrecht — **112**
    - a) Neues Steuerungsmodell und kommunales Haushaltsrecht — **112**
    - b) Haushaltssatzung, Haushaltsplan — **113**
    - c) Haushaltsvollzug — **114**
- XI. Das Recht der Landkreise (Kreise) — **115**
  1. Grundgesetzliche Rechtsstellung — **115**
    - a) Garantie der Kreisebene — **115**
    - b) Garantie der Selbstverwaltung — **116**
  2. Aufgaben der Kreise — **116**
    - a) Kreisaufgaben und staatliche Steuerung — **116**
    - b) Aufgabenverteilung zwischen Kreis und kreisangehörigen Gemeinden — **117**

- aa) Übergemeindliche Aufgaben — **117**
    - bb) Ergänzende Aufgaben — **117**
    - cc) Ausgleichende Aufgaben — **117**
    - dd) Kompetenz-Kompetenz — **118**
  - 3. Organe des Kreises — **118**
    - a) Kreistag — **118**
    - b) Landrat — **119**
    - c) Kreisausschuss — **119**
  - 4. Staatliche Verwaltung im Kreis — **119**
- XII. Sonstige Gemeindeverbände, Zweckverbände, interkommunale Zusammenarbeit — 120**
- 1. Gesamtgemeinden — **121**
  - 2. Höhere Gemeindeverbände — **123**
  - 3. Interkommunale Zusammenarbeit, Zweckverbände — **123**
    - a) Formen interkommunaler Zusammenarbeit — **123**
    - b) Insbesondere Zweckverbandsbildungen — **124**

## **Zweites Kapitel**

### **Polizei- und Ordnungsrecht**

- I. Grundlagen des Polizei- und Ordnungsrechts — 128**
- 1. Begriff und Gegenstand des Polizei- und Ordnungsrechts — **128**
    - a) Polizeibegriff als Spiegel gesellschaftlicher Entwicklungen — **129**
      - aa) Wandlungen des Polizeibegriffs — **129**
      - bb) Heutige Polizeibegriffe — **130**
    - b) Inhalt und Umfang des Gefahrenabwehrrechts — **131**
      - aa) Abgrenzung zur Strafverfolgung — **131**
      - bb) Einbeziehung vorbeugender Bekämpfung von Straftaten — **133**
    - c) Fazit — **138**
  - 2. Gefahrenabwehr als staatliche Aufgabe — **138**
    - a) Gewährleistung der Inneren Sicherheit als Staatsaufgabe — **138**
    - b) Gefahrenabwehr durch Private — **139**
      - aa) Erscheinungsformen des privaten Sicherheitsgewerbes — **140**
      - bb) Rechtliche Grundlagen — **141**
      - cc) Privatisierung der Gefahrenabwehr — **144**
    - c) Fazit — **145**
  - 3. Rechtsstaatliche Anforderungen an die Gefahrenabwehr — **145**
    - a) Vorrang und Vorbehalt des Gesetzes — **145**
    - b) Rechtliche Bindungen für Gefahrenabwehrmaßnahmen — **146**
  - 4. Polizei- und Ordnungsrecht im Bundesstaat — **147**
    - a) Gesetzgebung — **147**
    - b) Verwaltung — **148**
      - aa) Grundsatz: Verwaltungszuständigkeit der Länder — **148**
      - bb) Ausnahme: Verwaltungskompetenzen des Bundes — **148**
  - 5. Europäisierung und Internationalisierung der Gefahrenabwehr — **159**
    - a) Europarechtliche Vorgaben — **159**
      - aa) Grundlegung: Raum der Freiheit, der Sicherheit und des Rechts — **160**
      - bb) Ausprägungen Polizeilicher Zusammenarbeit — **160**

- cc) Institutionalisierung der Polizeilichen Zusammenarbeit — **162**
  - dd) Operative Polizeiliche Zusammenarbeit — **164**
- b) Internationalisierung der Gefahrenabwehr — **165**
- 6. Allgemeine Polizei- und Ordnungsverwaltung — **166**
- II. Materielles Polizei- und Ordnungsrecht — **168**
  - 1. Die Generalklausel — **168**
    - a) Die Generalklausel als Eingriffsermächtigung — **168**
      - aa) Spezialermächtigungen und Subsidiarität der Generalklausel — **168**
      - bb) Anwendungsbereich der Generalklausel — **173**
      - cc) Struktur und Bedeutung der Generalklausel — **175**
    - b) Schutzgüter der Generalklausel — **176**
      - aa) Öffentliche Sicherheit — **176**
      - bb) Öffentliche Ordnung — **183**
    - c) Gefahrenlage — **186**
      - aa) Störung — **187**
      - bb) Prognose — **187**
      - cc) Anscheinsgefahr — **189**
      - dd) Gefahrverdacht — **190**
      - ee) Qualifizierte Gefahrbegriffe — **192**
    - d) Befugnis zur Gefahrenabwehr (Opportunitätsprinzip) — **193**
      - aa) Ermessen der Gefahrenabwehrbehörden — **193**
      - bb) Ermessensgrenzen — **194**
      - cc) Ermessensreduzierung — **200**
      - dd) Anspruch auf Einschreiten — **201**
  - 2. Polizei- und ordnungsrechtliche Verantwortlichkeit — **202**
    - a) Polizei- und Ordnungspflicht als Zurechnungsproblem — **202**
    - b) Funktion und Bedeutung der Verantwortlichkeit — **203**
    - c) Rechtssubjekte der Polizei- und Ordnungspflicht — **205**
    - d) Verhaltensverantwortlichkeit — **206**
      - aa) Gefahrverursachung — **207**
      - bb) Verhaltensverantwortlichkeit durch Unterlassen — **209**
      - cc) Verhaltensverantwortlichkeit des Zweckveranlassers — **211**
      - dd) Zusatzverantwortlichkeit — **213**
    - e) Zustandsverantwortlichkeit — **213**
      - aa) Legitimität der Zustandsverantwortlichkeit — **214**
      - bb) Entstehung der Zustandsverantwortlichkeit — **214**
      - cc) Grenzen der Zustandsverantwortlichkeit — **215**
      - dd) Zustandsverantwortliche Rechtssubjekte — **217**
      - ee) Ordnungspflicht im Insolvenzverfahren — **219**
      - ff) Latente Gefahr — **221**
      - gg) Anscheinsgefahr und Gefahrverdacht — **221**
    - f) Rechtsnachfolge in die Polizei- und Ordnungspflicht — **222**
      - aa) Problemstellung — **222**
      - bb) Abstrakte Polizei- und Ordnungspflicht — **223**
      - cc) Konkretisierte Polizei- und Ordnungspflicht — **224**
      - dd) Fazit — **226**
    - g) Störermehrheit: Auswahlermessen bei mehreren Verantwortlichen — **226**
      - aa) Effektivität der Gefahrenabwehr als Ermessensdirektive — **227**

- bb) Kostentragung bei Störermehrheit — **229**
    - cc) Gesamtschuldnerausgleich bei mehreren Verantwortlichen — **230**
  - 3. Polizeilicher und ordnungsbehördlicher Notstand — **230**
    - a) Notstandspflicht im Gefahrenabwehrrecht — **230**
    - b) Voraussetzungen für Notstandsmaßnahmen — **232**
      - aa) Qualifizierte Gefahrenlage — **233**
      - bb) Aussichtslosigkeit der Gefahrenabwehr durch Verantwortlichen — **233**
      - cc) Unmöglichkeit behördlicher Gefahrenabwehr — **235**
      - dd) Beachtung der Opfergrenze — **236**
    - c) Rechtsfolgen der Notstandspflicht — **237**
    - d) Umfang und Dauer von Notstandsmaßnahmen — **237**
    - e) Folgenbeseitigung und Ersatzansprüche — **238**
      - aa) Folgenbeseitigung bei Notstandsmaßnahmen — **238**
      - bb) Entschädigung des Nichtverantwortlichen — **239**
  - 4. Standardmaßnahmen — **239**
    - a) Begriff und Bedeutung — **239**
    - b) Klassische Standardmaßnahmen — **240**
      - aa) Befragung und Auskunftsverlangen — **241**
      - bb) Identitätsfeststellung — **241**
      - cc) Erkennungsdienstliche Maßnahmen — **244**
      - dd) Vorladung und Vorführung — **245**
      - ee) Platzverweisung, Aufenthaltsverbot, Wohnungsverweisung — **246**
      - ff) Ingewahrsamnahme — **253**
      - gg) Durchsuchung von Personen und Sachen — **260**
      - hh) Durchsuchung und Betreten von Wohnungen — **261**
      - ii) Sicherstellung und Beschlagnahme — **264**
    - c) Informationserhebung — **269**
      - aa) Allgemeine Grundsätze — **269**
      - bb) Rechtsgrundlagen — **271**
      - cc) Besondere Mittel der Informationserhebung — **272**
      - dd) Rechtmäßigkeitsvoraussetzungen — **273**
    - d) Informationsverarbeitung — **275**
      - aa) Allgemeine Grundsätze — **275**
      - bb) Ermittlungsverfahren und Gefahrenabwehr — **275**
      - cc) Informationsabgleich — **276**
      - dd) Informationsübermittlung — **277**
      - ee) Rechte der betroffenen Person — **279**
  - 5. Sondergesetzliche Eingriffsbefugnisse — **280**
    - a) Vorrang von Spezialregelungen — **280**
    - b) Beispiel: Gefahrenabwehr im Versammlungswesen — **281**
- III. Formelles Polizei- und Ordnungsrecht — **283**
  - 1. Zuständigkeitsordnung — **283**
  - 2. Handlungsformen zur Gefahrenabwehr — **284**
    - a) Einzelfallmaßnahmen — **284**
      - aa) Verwaltungsakt — **285**
      - bb) Verwaltungsrealakt — **285**
    - b) Gefahrenabwehrverordnungen — **286**
      - aa) Funktion und Bedeutung von Gefahrenabwehrverordnungen — **286**
      - bb) Voraussetzungen für Gefahrenabwehrverordnungen — **287**



- cc) Determinanten für den Verordnungserlass — **290**
- dd) Durchsetzung der Verordnung — **291**
- c) Zwangsweise Durchsetzung von Gefahrenabwehrmaßnahmen — **291**
  - aa) Zwangsmittel — **292**
  - bb) Verwaltungszwang im gestreckten Verfahren — **294**
  - cc) Unmittelbare Ausführung und Sofortvollzug — **297**
- IV. Kostenersatz und Entschädigung im Polizei- und Ordnungsrecht — **300**
  - 1. Kostenersatzansprüche der Verwaltung — **300**
    - a) Vorbehalt des Gesetzes — **300**
    - b) Kostenersatz für Gefahrenabwehrmaßnahmen — **301**
    - c) Kostentragung bei Anscheinsgefahr und Gefahrverdacht — **304**
  - 2. Ersatzansprüche des Bürgers — **304**
    - a) Entschädigungsanspruch des Nichtstörers — **304**
      - aa) Voraussetzungen des Schadensausgleichs — **305**
      - bb) Rechtsfolge des Anspruchs — **306**
    - b) Schadensausgleich bei rechtswidrigen Maßnahmen — **307**
    - c) Ersatzansprüche bei Anscheinsgefahr und Gefahrverdacht — **308**

### **Drittes Kapitel**

#### **Öffentliches Wirtschaftsrecht**

- I. Grundlagen des Öffentlichen Wirtschaftsrechts — **314**
  - 1. Herausbildung und Gegenstand des Öffentlichen Wirtschaftsrechts — **314**
  - 2. Historische Grundlagen — **315**
    - a) Merkantilismus — **316**
    - b) Liberalismus — **316**
    - c) Sozialstaat und Soziale Marktwirtschaft — **317**
    - d) Europäisierung und Internationalisierung – Kapitalismus II — **318**
  - 3. Marktwirtschaft und Wettbewerb, Planwirtschaft und Sozialisierung — **319**
- II. Verfassungsrechtliche Grundlagen — **320**
  - 1. Wirtschaftsverfassung — **320**
    - a) Begriff der Wirtschaftsverfassung — **320**
    - b) Streit um die Wirtschaftsverfassung des Grundgesetzes — **320**
    - c) Der soziale Rechtsstaat — **322**
  - 2. Gesetzgebung und Regierung im Öffentlichen Wirtschaftsrecht — **324**
    - a) Bundesstaatliche Kompetenzverteilung und Öffentliches Wirtschaftsrecht — **324**
    - b) Rechtsstaatliche Anforderungen — **325**
      - aa) Gesetzmäßigkeit der Verwaltung — **325**
      - bb) Einzelfragen der Gesetzgebung — **325**
  - 3. Grundrechtsschutz wirtschaftlicher Tätigkeit — **327**
    - a) Allgemeines — **327**
      - aa) Grundrechtsberechtigung — **328**
      - bb) Grundsatz der Verhältnismäßigkeit — **328**
      - cc) Grundsatz des Vertrauensschutzes — **329**
    - b) Allgemeiner Gleichheitssatz — **329**
    - c) Allgemeine Wirtschafts- und Unternehmensfreiheit — **331**

- d) Koalitionsfreiheit — **332**
  - e) Berufsfreiheit — **333**
    - aa) Schutzbereich — **333**
    - bb) Schranken — **335**
    - cc) Eingriffsermächtigungen — **337**
    - dd) Schutzpflicht — **338**
  - f) Eigentumsgarantie — **338**
    - aa) Struktur — **338**
    - bb) Schutzbereich — **339**
    - cc) Schranken — **341**
- III. Unionsrechtliche Grundlagen — 343**
- 1. Allgemeines — **343**
  - 2. Die europäische Rechtsordnung als wechselseitige Auffang- und Kooperationsordnung — **344**
  - 3. Grundzüge des Unionsrechts, allgemeine Rechtsgrundsätze — **346**
    - a) Grundrechte — **346**
      - aa) Anwendungsbereich — **346**
      - bb) Wirtschaftsgrundrechte — **347**
      - cc) Sonstige Grundrechte — **348**
    - b) Rechtsangleichung — **349**
    - c) Staatshaftung — **349**
  - 4. Binnenmarkt und Grundfreiheiten — **350**
    - a) Grundfreiheiten — **350**
    - b) Unionales Wettbewerbsrecht — **351**
- IV. Wirtschafts- und Währungspolitik — 352**
- 1. Begriffe — **352**
  - 2. Wirtschaftspolitik — **355**
    - a) Konjunkturpolitik und Globalsteuerung — **355**
      - aa) Ökonomische Konzeption — **355**
      - bb) Bindungswirkung — **355**
      - cc) Instrumentarium — **356**
      - dd) Bewertung — **356**
    - b) Fiskalpolitik — **357**
      - aa) Unionsrechtliche Grundlagen — **357**
      - bb) Innerstaatliche Regelungen — **358**
      - cc) Völkerrechtliche Ergänzungen — **359**
    - c) Außenhandelspolitik — **359**
    - d) Wirtschaftsstatistik — **360**
  - 3. Währungsunion und Währungspolitik — **360**
    - a) Eintrittsvoraussetzungen — **361**
    - b) Organisation und Aufgaben des ESZB — **362**
    - c) Ausrichtung des ESZB auf die Preisstabilität — **363**
    - d) Die Währungsunion in der Krise – Von der Stabilitäts- zur Stabilisierungsunion — **364**
- V. Wirtschaftsverwaltung — 365**
- 1. Organisation — **365**
    - a) Unionale Wirtschaftsverwaltung — **365**

- b) Staatliche Wirtschaftsverwaltung in Bund und Ländern — **366**
      - aa) Bundesverwaltung — **366**
      - bb) Landesverwaltung — **368**
    - c) Selbstverwaltung der Wirtschaft — **369**
      - aa) Allgemeines — **369**
      - bb) Selbstverwaltungsträger — **370**
      - cc) Europäisierung des Kammerrechts — **372**
    - d) Koalitionen und Wirtschaftsverbände — **374**
  - 2. Verwaltungszwecke und Steuerungskonzepte im Öffentlichen Wirtschaftsrecht — **375**
    - a) Überwachung — **375**
      - aa) Funktion und Zielsetzung — **375**
      - bb) Referenzgebiete — **376**
      - cc) Beteiligung Privater an der Überwachung — **377**
    - b) Regulierung — **378**
      - aa) Einordnung der Regulierungsverwaltung — **379**
      - bb) Referenzgebiete — **380**
    - c) Wirtschaftslenkung — **380**
      - aa) Marktordnungen — **381**
      - bb) Punktuelle Interventionen — **382**
  - 3. Rechts- und Handlungsformen der Verwaltung im Öffentlichen Wirtschaftsrecht — **382**
    - a) Öffentlich-rechtliche Bindung und Formenwahlfreiheit der Verwaltung — **382**
    - b) Überwachung, Regulierung und Wirtschaftslenkung durch Verwaltungsakt — **384**
      - aa) Überwachungsrechtliche Verwaltungsakte — **384**
      - bb) Wirtschaftslenkende Verwaltungsakte — **385**
      - cc) Nebenbestimmungen — **386**
      - dd) Privatrechtsgestaltende Verwaltungsakte — **386**
    - c) Vorhaben- und Unternehmeregnehmigungen mit planungsrechtlichem Einschlag — **386**
      - aa) Allgemeines — **386**
      - bb) Atomanlagen — **389**
      - cc) Flughäfen und Flugplätze — **390**
- VI. Beihilfenrecht — **393**
  - 1. Allgemeines — **393**
  - 2. Staatliche Beihilfen — **395**
    - a) Begriffe — **395**
    - b) Beihilfen und Vorbehalt des Gesetzes — **396**
    - c) Verwaltungsrechtliche Ausgestaltung des Zuwendungsrechtsverhältnisses — **397**
    - d) Unionsrechtliche Anforderungen — **398**
  - 3. Unionsbeihilfen — **400**
    - a) Indirekter Vollzug — **400**
    - b) Direkter Vollzug — **401**
- VII. Öffentliches Wettbewerbsrecht — **401**
  - 1. Unternehmerische Betätigung der Öffentlichen Hand — **402**
    - a) Grundlagen öffentlicher Unternehmenstätigkeit — **402**
      - aa) Formen — **402**
      - bb) Kommunale Wirtschaftstätigkeit — **403**
    - b) Landesbanken und Sparkassen — **404**

- c) Grundrechte und Haushaltsrecht — **405**
  - aa) Eingriff durch Konkurrenz — **405**
  - bb) Haushaltsrecht — **406**
- d) Gesellschaftsrecht und Wettbewerbsrecht — **406**
  - aa) Gesellschaftsrecht — **406**
  - bb) Wettbewerbsrecht — **407**
- e) Unionsrechtliche Bindungen — **407**
- 2. Vergaberecht — **408**
  - a) Aufträge oberhalb der Schwellenwerte — **409**
    - aa) Allgemeines — **409**
    - bb) Vergabefremde Kriterien — **410**
  - b) Aufträge unterhalb der Schwellenwerte — **411**
  - c) Dienstleistungskonzessionen — **411**

## **VIII. Gewerberecht — 412**

- 1. Gewerbefreiheit — **412**
  - a) Begriff des Gewerbes — **412**
    - aa) Gewerbsmäßigkeit — **413**
    - bb) Gewerbsfähigkeit — **413**
  - b) Kompetenzrechtliche Dimension von § 1 GewO — **415**
- 2. Grundlagen gewerberechtllicher Überwachungsmaßnahmen — **416**
  - a) Formales Instrumentarium — **416**
    - aa) Anzeigepflichtige Gewerbe — **416**
    - bb) Genehmigungspflichtige Gewerbe — **416**
  - b) Materielle Maßstäbe: Sachkunde, Zuverlässigkeit — **417**
    - aa) Subjektive Anforderungen — **417**
    - bb) Objektive Anforderungen — **420**
  - c) Weitere Anforderungen — **420**
- 3. Einzelne gewerberechtliche Erlaubnisse — **420**
  - a) Stehendes Gewerbe, Reisegewerbe, Marktverkehr — **420**
    - aa) Stehendes Gewerbe — **420**
    - bb) Reisegewerbe — **420**
    - cc) Marktverkehr — **421**
  - b) Handwerk — **421**
    - aa) Anwendungsbereich — **422**
    - bb) Eintragung in die Handwerksrolle und Überwachung — **423**
    - cc) Berufsausbildung — **424**
  - c) Gaststättengewerbe — **425**
  - d) Beförderungsgewerbe — **426**
    - aa) Personenbeförderungsrecht — **426**
    - bb) Güterkraftverkehr — **428**

## **IX. Regulierungsverwaltung — 428**

- 1. Energiewirtschaftsrecht — **428**
- 2. Eisenbahnen, Post und Telekommunikation — **430**
  - a) Eisenbahnen — **430**
  - b) Post und Telekommunikation — **431**
    - aa) Post — **432**
    - bb) Telekommunikation — **432**

## **Viertes Kapitel Baurecht**

- I. Einführung — **435**
  1. Aufgaben, Begriff und Gegenstände des Baurechts — **435**
    - a) Privates Baurecht — **436**
    - b) Öffentliches Baurecht — **436**
      - aa) Raumordnungsrecht — **436**
      - bb) Städtebaurecht — **437**
      - cc) Bauordnungsrecht — **437**
      - dd) Verhältnis des Städtebaurechts zum Bauordnungsrecht — **437**
  2. Die verfassungsrechtliche Vorordnung des Baurechts — **438**
    - a) Die bundesstaatliche Kompetenzverteilung für das öffentliche Baurecht — **438**
      - aa) Gesetzgebungszuständigkeiten — **438**
      - bb) Rechtsquellen — **439**
      - cc) Verwaltungszuständigkeiten — **441**
    - b) Selbstverwaltungsrecht der Gemeinden — **441**
    - c) Grundrechte — **447**
      - aa) Baurecht und Baufreiheit — **447**
      - bb) Leistungsrechtliche Aspekte — **449**
- II. Raumordnungsrecht — **451**
  1. Aufgaben, Leitvorstellungen und Prinzipien der Raumordnung — **452**
  2. Zielsetzung der Raumordnungsplanung und Typen planerischer Aussagen — **452**
    - a) Zielsetzung der Raumordnungsplanung — **452**
    - b) Typen planerischer Aussagen — **453**
  3. Raumordnungsgrundsätze des Bundes — **455**
    - a) Inhalt der Raumordnungsgrundsätze des Bundes — **455**
    - b) Verwirklichung der Raumordnungsgrundsätze des Bundes — **456**
  4. Raumordnungsplanung — **456**
    - a) Allgemeine Vorgaben — **456**
    - b) Raumordnungsplanung der Länder — **457**
      - aa) Besondere bundesrechtliche Vorgaben — **457**
      - bb) Landesrechtliche Regelungen — **459**
      - cc) Landesweite Raumordnungsplanung — **460**
      - dd) Regionalplanung — **462**
    - c) Raumordnungsplanung des Bundes — **463**
    - d) Verwirklichung der Raumordnungsplanung — **464**
  5. Sonstige Instrumente der Raumordnung — **465**
    - a) Untersagung raumbedeutsamer Planungen und Maßnahmen — **465**
    - b) Raumordnungsverfahren — **466**
  6. Rechtsschutzfragen des Raumordnungsrechts — **467**
    - a) Rechtsschutzkonstellationen — **467**
    - b) Rechtsschutz gegen Raumordnungspläne — **467**
- III. Städtebaurecht — **469**
  1. Typen der Bauleitplanung — **469**
    - a) Flächennutzungsplan — **470**
      - aa) Inhalt — **470**
      - bb) Rechtswirkungen — **471**

- b) Bebauungsplan — **472**
      - aa) Inhalt — **472**
      - bb) Rechtswirkungen — **474**
      - cc) Vorhabenbezogener Bebauungsplan gem § 12 BauGB — **475**
  - 2. Aufstellung der Bauleitpläne — **476**
    - a) Planungspflicht — **476**
    - b) Anpassungs- und Entwicklungspflichten — **478**
    - c) Abwägungsgebot und Planungsmaßstäbe — **479**
      - aa) Bauleitplanung und Struktur der Planungsnormen — **479**
      - bb) Rechtsbindung — **481**
      - cc) Kontrollmaßstäbe — **484**
    - d) Aufstellungsverfahren — **485**
    - e) Fehlerfolgen — **489**
    - f) Außerkrafttreten — **491**
  - 3. Die bauplanungsrechtliche Zulässigkeit von Vorhaben — **492**
    - a) Allgemeines — **492**
    - b) Zulässigkeit von Vorhaben im Geltungsbereich eines qualifizierten oder vorhabenbezogenen Bebauungsplans — **494**
      - aa) § 30 I BauGB bzw § 30 II BauGB — **494**
      - bb) Ausnahmen und Befreiungen — **494**
    - c) Zulässigkeit von Vorhaben innerhalb der im Zusammenhang bebauten Ortsteile (§ 34 BauGB) — **495**
    - d) Zulässigkeit von Vorhaben im Außenbereich — **496**
    - e) Zulässigkeit von Vorhaben aufgrund besonderen Grundrechtsschutzes? — **499**
    - f) Ausnahmen — **501**
  - 4. Instrumente und Maßnahmen zur Verwirklichung und Sicherung der Bauleitplanung — **502**
    - a) Veränderungssperre und Zurückstellung von Baugesuchen — **502**
    - b) Grundstücksteilung — **503**
    - c) Gemeindliche Vorkaufsrechte — **504**
    - d) Umlegung und vereinfachte Umlegung — **505**
    - e) Erschließung — **506**
    - f) Enteignung — **507**
      - aa) Gegenstand — **508**
      - bb) Zulässigkeit — **508**
      - cc) Entschädigung — **509**
      - dd) Verfahren — **509**
      - ee) Rechtsweg — **510**
    - g) Städtebauliche Verträge — **510**
  - 5. Besonderes Städtebaurecht — **511**
    - a) Sanierungs- und Entwicklungsmaßnahmen — **512**
    - b) Stadtumbau — **513**
    - c) Soziale Stadt — **513**
    - d) Private Initiativen — **513**
    - e) Erhaltungssatzung und städtebauliche Gebote — **514**
  - 6. Planschadensrecht — **514**
- IV. Bauordnungsrecht — **516**
  - 1. Funktionen des Bauordnungsrechts — **516**

- a) Gefahrenabwehr — **517**
    - b) Ästhetische Anforderungen — **519**
    - c) Soziale Standards — **521**
    - d) Ökologische Standards — **521**
  - 2. Die baurechtliche Verantwortlichkeit — **522**
  - 3. Bauaufsichtsbehörden — **522**
  - 4. Zulassung von Vorhaben — **523**
    - a) Genehmigungsbedürftige Vorhaben — **523**
      - aa) Genehmigungsarten — **523**
      - bb) Anspruch auf Genehmigung — **524**
      - cc) Abweichungen bzw Ausnahme und Befreiung — **524**
      - dd) Nebenbestimmungen — **525**
      - ee) Regelungsgehalt — **525**
      - ff) Verfahren — **526**
      - gg) Wirksamkeit, Geltungsdauer — **529**
    - b) Nicht-genehmigungsbedürftige Vorhaben — **529**
  - 5. Bauüberwachung und (Wieder-)Herstellung baurechtmäßiger Zustände — **530**
    - a) Bauüberwachung — **530**
    - b) (Wieder-)Herstellung baurechtmäßiger Zustände — **531**
      - aa) Ermächtigungsgrundlagen — **531**
      - bb) Bestandsschutz rechtmäßig errichteter baulicher Anlagen — **532**
      - cc) Vorgehen gegen rechtswidrig errichtete bauliche Anlagen — **533**
- V. Rechtsschutzfragen des Städtebau- und Bauordnungsrechts — **535**
- 1. Gerichtlicher Rechtsschutz gegen städtebauliche Pläne — **535**
    - a) Prinzipale Normenkontrolle — **535**
    - b) Individualrechtsschutzverfahren — **536**
  - 2. Klage auf Erteilung einer Baugenehmigung — **537**
    - a) Verpflichtungsklage — **537**
    - b) Rechtsschutz gegen Nebenbestimmungen — **538**
  - 3. Drittschutz (Nachbarschutz) — **539**
    - a) Begriff des „Nachbarn“ — **539**
    - b) Einfachgesetzlicher Drittschutz — **540**
    - c) Unvermittelter grundrechtlicher Drittschutz — **542**
    - d) Verfahrensfragen — **543**

## **Fünftes Kapitel**

### **Umweltschutzrecht**

- I. Entstehung und Entwicklung des Umweltschutzrechts — **551**
- II. Umweltschutzrecht als Rechtsgebiet — **553**
  - 1. Umweltrecht als zielzentriertes Rechtsgebiet — **553**
  - 2. Umweltrecht als Mehrebenensystem — **554**
    - a) Bedeutung der Ebenen — **554**
      - aa) Die völkerrechtliche Ebene — **554**
      - bb) Besondere Bedeutung der europäischen Ebene — **556**
      - cc) Relativer Bedeutungsverlust der nationalen Ebene — **557**
    - b) Kompetenzverteilung zwischen den Ebenen — **558**

- aa) Rechtsetzung — **558**
- bb) Verwaltung — **560**

**III. Prinzipien des Umweltrechts — 561**

1. Bedeutung der Prinzipien — **562**
2. Verursacherprinzip — **563**
3. Schutz-, Vorbeuge- und Vorsorgeprinzip — **564**
  - a) Ziele und Ansätze — **564**
  - b) Vorgaben und Abgrenzungen in Unions- und nationalem Recht — **565**
  - c) Vorsorge als Legitimation und Auftrag einer Umweltgesetzgebung — **566**
  - d) Umsetzung und Ausgestaltung im Verwaltungsrecht — **568**
4. Nachhaltigkeitsprinzip — **569**
5. Integrationsprinzip — **570**
6. Weitere Prinzipien — **571**

**IV. Instrumente und Charakteristika des Umweltrechts — 571**

1. Instrumentelle Perspektive im Umweltrecht — **571**
2. Hoheitliche Regulierung — **573**
  - a) Normkonkretisierung durch untergesetzliche und private Regelung — **573**
  - b) Differenzierte Eröffnungskontrollen, insbesondere Genehmigung — **574**
  - c) Hohe Bedeutung und umfangreiche Ausgestaltung der Verfahren — **577**
    - aa) Charakteristische Bausteine — **577**
    - bb) Zentraler Verfahrenskomplex: Umweltverträglichkeitsprüfung — **578**
    - cc) Informale Verfahrenselemente — **580**
  - d) Koordination der Einzelmaßnahmen durch staatliche Planung — **580**
  - e) Räumliche Pflichtenregime durch Schutzgebiete — **581**
  - f) Überwachung — **581**
    - aa) Staatliche Überwachung und Eigenüberwachung — **581**
    - bb) Repressive Maßnahmen bei Verstößen — **582**
3. Regulierte Selbstregulierung — **583**
  - a) Nutzung von Organisation — **583**
    - aa) Organisationsvorgaben, insbesondere Betriebsbeauftragte — **583**
    - bb) Umwelt-Audit — **584**
  - b) Ausgestaltung des ökonomischen Marktes — **586**
    - aa) Folgenrechnung durch „Haftung“ (UmwHG; USchadG; Fonds) — **586**
    - bb) Abgaben — **588**
    - cc) Finanzielle Förderung — **589**
    - dd) Nutzung staatlicher Nachfragemacht — **590**
    - ee) Schaffung von Markttransparenz: Umweltkennzeichen, Informations-handeln — **591**
  - c) Einrichtung eines ökonomischen Marktes — **591**
    - aa) Zertifikate — **591**
    - bb) Private Entsorgungsstrukturen — **593**
  - d) Effektivierung politischer Öffentlichkeit: Umweltinformationen — **594**
  - e) Schatten des Rechts: Selbstverpflichtungen der Wirtschaft — **596**
4. Instrumentenmix als Strategie — **597**
5. Rechtsschutz — **598**
  - a) Grundkonstellationen — **598**
  - b) Allgemeiner Rahmen des Rechtsschutzes — **598**



- c) Klageart — **599**
  - d) Subjektive Rechte und Klagebefugnis — **599**
    - aa) Schutz und Vorsorge — **599**
    - bb) Abgeschichtete Entscheidungen — **600**
  - e) Klagemöglichkeiten von Umweltverbänden — **601**
  - f) Verfahrensrechte — **602**
  - g) Kontrolldichte — **603**
- V. Das Recht des Naturschutzes und der Landschaftspflege — **604**
  - 1. Allgemeines — **604**
  - 2. Landschaftsplanung — **606**
  - 3. Eingriffe in Natur und Landschaft — **606**
    - a) Allgemeiner Bestandsschutz — **606**
    - b) Besonderer Biotopschutz — **608**
  - 4. Schutzgebiete — **608**
  - 5. Artenschutz — **609**
- VI. Bodenschutzrecht — **609**
  - 1. Allgemeines — **609**
  - 2. Grundsätze und Pflichten des Bodenschutzes — **610**
  - 3. Ergänzende Vorschriften für Altlasten — **612**
  - 4. Wertausgleich — **613**
- VII. Wasserrecht — **613**
  - 1. Allgemeines — **613**
  - 2. Die allgemeine wasserwirtschaftsrechtliche Benutzungsordnung — **614**
    - a) Verwaltungs- und verfassungsrechtliche Grundsätze — **614**
    - b) Die Rechtsinstitute der Erlaubnis und der Bewilligung — **615**
    - c) Erlaubnis- oder bewilligungspflichtige Benutzungen — **616**
    - d) Die allgemeinen Voraussetzungen der Erteilung einer Erlaubnis oder Bewilligung — **618**
    - e) Nebenbestimmungen, nachträgliche Beschränkungen und Widerruf einer Erlaubnis oder Bewilligung — **619**
    - f) Gewässeraufsicht und repressives Einschreiten der Wasserbehörden — **620**
  - 3. Maßnahmen- und Bewirtschaftungspläne — **621**
  - 4. Die Festsetzung von Wasserschutzgebieten — **621**
  - 5. Unterhaltung und Ausbau oberirdischer Gewässer — **622**
- VIII. Immissionsschutzrecht — **623**
  - 1. Allgemeines — **623**
  - 2. Genehmigungsbedürftige Anlagen — **624**
    - a) Kreis der genehmigungsbedürftigen Anlagen — **625**
    - b) Genehmigungsvoraussetzungen — **625**
      - aa) Betreiberpflichten — **625**
      - bb) Weitere immissionsschutzrechtliche Genehmigungsvoraussetzungen — **630**
      - cc) Außer-immissionsschutzrechtliche Genehmigungsvoraussetzungen — **631**
    - c) Genehmigungsverfahren — **631**
    - d) Inhalt und Wirkung der Anlagengenehmigung — **632**
    - e) Vorbescheid und Teilgenehmigung — **634**
    - f) Nachträgliche Anordnungen — **634**

- g) Untersagung, Stilllegung und Beseitigung von Anlagen, Widerruf der Anlagengenehmigung — **636**
    - h) Anlagenbezogene Überwachung — **636**
  - 3. Nicht genehmigungsbedürftige Anlagen — **637**
  - 4. Der produktbezogene Immissionsschutz — **638**
  - 5. Der verkehrsbezogene Immissionsschutz — **639**
    - a) Grundlagen des Immissionsschutzes bei Straßen, Schienenwegen und Flughäfen — **639**
    - b) Sonderregelung des Fluglärmschutzgesetzes — **639**
  - 6. Der allgemeine handlungsbezogene Immissionsschutz — **640**
  - 7. Der gebietsbezogene Immissionsschutz — **640**
  - 8. Treibhausgasemissionshandel — **642**
    - a) Allgemeines — **642**
    - b) TEHG 2011, Zuteilung von Berechtigungen — **643**
- IX. Atom- und Strahlenschutzrecht — 644**
- 1. Allgemeines — **644**
  - 2. Die atomrechtliche Anlagengenehmigung — **645**
    - a) Grundlagen und Entwicklung — **645**
    - b) Genehmigungsvoraussetzungen — **646**
    - c) Versagungsermessen — **648**
    - d) Änderungsgenehmigung — **649**
    - e) Genehmigungsverfahren — **649**
  - 3. Radioaktive Reststoffe und Abfälle — **649**
  - 4. Atomrechtliche Haftung — **651**
- X. Kreislaufwirtschafts- und Abfallrecht — 652**
- 1. Allgemeines — **652**
  - 2. Abfallbegriff — **654**
  - 3. Grundsätze und Handlungspflichten im Kreislaufwirtschafts- und Abfallrecht — **655**
  - 4. Produktverantwortung — **658**
  - 5. Abfallwirtschaftspläne — **659**
  - 6. Abfallentsorgungsanlagen — **659**
  - 7. Überwachung — **660**

## **Sechstes Kapitel**

### **Das Recht des öffentlichen Dienstes**

- I. Gegenstand und Begriff — 663**
- 1. Zum systematischen Standort des Rechtsgebiets — **663**
  - 2. Öffentlicher und privater Dienst — **664**
  - 3. Gesichtspunkte der Abgrenzung — **665**
    - a) Dauer und Eingliederung — **665**
    - b) Abgrenzung nach dem Dienstherrn — **666**
    - c) Ausgrenzung des Rechts der Richter, Berufssoldaten und der kirchlichen Bediensteten — **667**
    - d) Dienstrecht als Straf- und Haftungsrecht — **667**
    - e) Kollektives Dienstrecht — **667**

- II. Zu Geschichte, Gegenwart und Zukunft des öffentlichen Dienstes — **669**
  - 1. Zur geschichtlichen Entwicklung — **669**
  - 2. Reformfragen — **672**
  
- III. Die Rechtsetzungsebenen im Recht des öffentlichen Dienstes und ihre Regelungsfelder — **675**
  - 1. Völkerrecht und europäisches Recht — **675**
  - 2. Verfassungsrecht — **677**
    - a) Institutionelle Verbürgung des Berufsbeamtentums — **677**
      - aa) Der Funktionsvorbehalt für Beamte — **677**
      - bb) Der verfassungsrechtliche Regelungsauftrag für das Beamtenrecht — **679**
    - b) Ämterzugang und Grundrechtsschutz im Dienstverhältnis — **683**
    - c) Bundesstaatliche Aspekte — **684**
  - 3. Das einschlägige Gesetzesrecht im Überblick — **685**
  
- IV. Das Beamtenrecht — **686**
  - 1. Beamtenbegriffe — **686**
    - a) Staatsrechtlicher, haftungsrechtlicher und strafrechtlicher Beamtenbegriff — **687**
    - b) Kategorien des staatsrechtlichen Beamtenbegriffs — **688**
      - aa) Bundesbeamte, Landesbeamte, Gemeindebeamte — **688**
      - bb) Berufsbeamte auf Lebenszeit und auf Zeit — **688**
      - cc) Beamte auf Probe und auf Widerruf — **689**
      - dd) Laufbahnbeamte — **689**
      - ee) Ehrenbeamte — **690**
      - ff) Politische Beamte — **690**
  - 2. Die Begründung, Veränderung und Beendigung des Beamtenverhältnisses — **691**
    - a) Die Ernennung zum Beamten — **691**
      - aa) Anwendungsfeld, Zuständigkeit, Form — **691**
      - bb) Objektive und subjektive Ernennungsvoraussetzungen — **693**
      - cc) Leistungsprinzip, Ernennungsanspruch, Konkurrenz — **697**
      - dd) Die Nichtigkeit der Ernennung — **703**
      - ee) Die Rücknahme der Ernennung — **704**
      - ff) Rechtsfolgen mangelhafter Ernennungen im Innen- und Außenverhältnis — **705**
    - b) Beförderung, Versetzung, Umsetzung und Abordnung — **707**
      - aa) Die Beförderung — **708**
      - bb) Die Versetzung — **709**
      - cc) Die Umsetzung — **709**
      - dd) Die Abordnung — **710**
    - c) Ruhestand, Entlassung und Entfernung aus dem Dienst — **710**
      - aa) Endgültiger und einstweiliger Ruhestand — **710**
      - bb) Die Entlassung — **712**
      - cc) Beendigung des Dienstverhältnisses infolge strafgerichtlicher Verurteilung — **714**
      - dd) Die Entfernung aus dem Dienst — **714**
  - 3. Pflichten und Rechte im Beamtenverhältnis — **714**
    - a) Die Pflichten des Beamten — **715**
      - aa) Dienstpflicht, Gehorsamspflicht, Residenzpflicht — **715**

- bb) Nebentätigkeit des Beamten — **717**
- cc) Neutralität und Unparteilichkeit im Amt — **718**
- dd) Amtsverschwiegenheit — **719**
- ee) Die politische Treuepflicht — **720**
- b) Dienstvergehen — **720**
- c) Haftung — **723**
- d) Die Beamtenrechte — **724**
  - aa) Spezielle Fürsorgeverpflichtungen — **724**
  - bb) Die allgemeine Fürsorgepflicht — **725**
  - cc) Dienstbezüge und deren Rückforderung — **727**
  - dd) Personalakten — **730**
- e) Die Bedeutung einzelner Grundrechte für die Rechtsstellung des Beamten — **732**
- 4. Rechtsbehelfe im Beamtenverhältnis — **735**
  - a) Außergerichtliche Rechtsbehelfe — **735**
  - b) Gerichtliche Rechtsbehelfe — **736**

## **Siebentes Kapitel**

### **Straßen- und Wegerecht**

- I. Grundlagen des öffentlichen Straßenrechts — **740**
  - 1. Begriffliche Vorklärungen — **741**
    - a) Straßenrecht — **741**
    - b) Straßenverkehrsrecht — **741**
  - 2. Das Verhältnis von Straßen- und Straßenverkehrsrecht — **741**
    - a) Der „Vorbehalt“ des Straßenrechts — **742**
    - b) Der „Vorrang“ des Straßenverkehrsrechts — **742**
    - c) Anordnungen nach § 45 StVO — **743**
  - 3. Strukturmerkmale des Gesetzesvollzuges — **745**
    - a) Verfassungsrechtliche Vorgaben — **745**
    - b) Straßenbau- und Straßenaufsichtsbehörden — **747**
    - c) Straßenverkehrsämter — **748**
  - 4. Sachenrechtliche Grundprinzipien des öffentlichen Straßenrechts — **748**
    - a) Öffentlicher Sachstatus der Straße — **748**
    - b) Die dualistische Vorstellung vom modifizierten Privateigentum — **749**
    - c) Das Prinzip der förmlichen Widmung — **750**
    - d) Formalisierungsprinzip — **750**
- II. Planung und Bau öffentlicher Straßen — **751**
  - 1. Vorbereitende Stufen der Straßenplanung — **751**
    - a) Ausbau- und Bedarfsplanung — **751**
    - b) Raumordnungsverfahren — **752**
    - c) Bestimmung der Planung und Linienführung — **753**
  - 2. Die straßenrechtliche Planfeststellung — **753**
    - a) Grundstrukturen des Verfahrensablaufs — **754**
    - b) Rechtsnatur der Planungsentscheidung — **756**
    - c) Rechtswirkungen des Planfeststellungsbeschlusses — **758**
    - d) Schutzauflagen gem § 74 II 2 VwVfG — **759**
    - e) Entbehrlichkeit der Planfeststellung — **760**

- 3. Rechtsschutzfragen — **762**
- 4. Der tatsächliche Bau öffentlicher Straßen — **764**
- III. Begründung, Veränderung und Beendigung des öffentlichen Sonderstatus — **764**
  - 1. Die Widmung — **765**
    - a) Rechtsnatur — **765**
    - b) Formelle und materielle Voraussetzungen — **766**
    - c) Inhalt der Widmungsverfügung — **766**
    - d) Rechtswirkungen — **767**
    - e) Rechtsschutz — **768**
  - 2. Die tatsächliche Indienststellung der Straße — **769**
  - 3. Veränderungen des Nutzungsumfangs — **769**
    - a) Widmungserweiterung — **769**
    - b) Teileinziehung — **769**
    - c) Einziehung durch Entwidmung — **770**
    - d) Umstufung — **771**
  - 4. Straßenrechtliche Statusakte im Dienste der Verkehrsberuhigung — **771**
- IV. Straßenbaulast und Straßenverkehrssicherungspflicht — **772**
  - 1. Die Straßenbaulast — **772**
  - 2. Die Straßenverkehrssicherungspflicht — **773**
- V. Das Regime straßenrechtlicher Nutzungsformen — **774**
  - 1. Der Gemeingebrauch — **775**
    - a) Inhalt und Bedeutung — **775**
    - b) Schranken — **776**
    - c) Die Rechtsstellung des Straßenbenutzers — **776**
  - 2. Die Sondernutzung — **777**
    - a) Begriff und Arten — **777**
    - b) Sondernutzungserlaubnisse nach öffentlichem Recht — **778**
    - c) Bürgerlich-rechtliche Sondernutzungen — **779**
  - 3. Sonderformen der „kommunikativen“ Straßennutzung — **781**
  - 4. Die Rechtsstellung des Straßenanliegers — **781**
    - a) Das Anliegerrecht — **782**
    - b) Der Anliegergebrauch — **783**
- VI. Das Nachbarrecht öffentlicher Straßen — **784**
  - 1. Die Aufrechterhaltung der Straßenfunktion — **784**
  - 2. Der Schutz der Straßennachbarn — **784**

Schlagwortverzeichnis — **787**
